# Supplementary material
Source: HighWire-hosted journal article supplement (https://cmajopen-stage.highwire.org/highwire/filestream/88885/field_highwire_adjunct_files/3/open-2022-0192-original-submission.pdf)
Supplement: open-2022-0192-original-submission.pdf [file open-2022-0192-original-submission.pdf]

**Title:** The quest for greater equity: A national cross-sectional study of the experiences of Black Canadian medical students

**Authors:** Mathieu, Johanne MD; Akinbobola, Kikelomo MD; Shipeolu, Lolade MD; Crosse, Kien MD; Thomas, Kimberley MSc; Denis-LeBlanc, Manon MD; Fotsing, Salomon MD; Bekolo, Gaelle MD

**Affiliations:**

**J. Mathieu** is an alumna of the undergraduate medical program at the University of Ottawa, and a current resident in the Ophthalmology program at the University of Sherbrooke, Sherbrooke, QC.

**K. Akinbobola** is a family medicine alumna of the University of Ottawa and practicing family physician at the Royal Columbian Hospital, New Westminster, B.C

**L. Shipeolu** is an alumna of the undergraduate medical program at the University of Ottawa, and a current resident in the Obstetrics and Gynecology program at University of British Columbia, Vancouver, B.C.

**K. Crosse** is an alumnus of the undergraduate medical program at the University of Ottawa, and a current resident in the Psychiatry program at the University of Toronto, Toronto, ON

**K. Thomas** is a medical student at the Faculty of Medicine of the University of British Columbia and Western regional director of the Black Medical Student's Association of Canada (BMSAC).

**M. Denis-LeBlanc** is a family physician and Vice Dean Francophone Affairs at the Faculty of Medicine of the University of Ottawa, Clinical Researcher at the *Institut du Savoir Montfort*, Ottawa, ON.

1  
2  
3  
4  
5  
6  
7  
8  
9  
10  
11  
12  
13  
14  
15  
16  
17  
18  
19  
20  
21  
22  
23  
24  
25  
26  
27  
28  
29  
30  
31  
32  
33  
34  
35  
36  
37  
38  
39  
40  
41  
42  
43  
44  
45  
46  
47  
48  
49  
50  
51  
52  
53  
54  
55  
56  
57  
58  
59  
60

**S. Fotsing** is lecturer in the Department of Family Medicine at the University of Ottawa and Research Manager in Medical Education at the Francophones Affaires, Faculty of Medicine, University of Ottawa, Ottawa, ON.

**G. Bekolo** is a practicing family physician in the Department of Family Medicine of Montfort Hospital, Black Health Leader within the Department of Undergraduate Medical Education of the University of Ottawa, Ottawa, ON.

Correspondence should be addressed to Johanne Mathieu; e-mail: [jmath076@uottawa.ca](mailto:jmath076@uottawa.ca)

Correspondence may also be addressed to the principal investigator of the study Gaelle Bekolo; e-mail: [gaellebekolo@montfort.on.ca](mailto:gaellebekolo@montfort.on.ca)

*Acknowledgements:* The authors wish to thank Dr. Abdoulaye Gueye and Sara Mwamba, MA for the expert contribution provided throughout this project including in the manuscript review. Professor Abdoulaye Gueye (PhD) is a professor and researcher at the School of Sociological and Anthropological Studies of the department of Social Sciences at the University of Ottawa. His primary research focus includes globalization and racial studies, including African studies both in Africa and in the diaspora. Sara N. Mwamba (MA) is a sociologist who has offered her expertise in interethnic relations to a wide range of Canadian organizations. Her research interest center on the African, Caribbean and Black experience in Canadian medical and health systems as it relates to blood donation. The authors would also like to thank the Black Medical Student’s Association of Canada for collaborating with our team in the dissemination of our questionnaire and the *Association Médicale Universitaire de l’Hôpital Montfort* for financing our research project.

1  
2  
3 Finally, the authors thank the Office of Francophone affairs at the Faculty of Medicine of the  
4  
5 University of Ottawa for their continued support throughout this project.  
6  
7  
8  
9

10 *Funding/Support:* The authors J. Mathieu, L. Shipeolu K. Crosse, S. Fotsing and G. Bekolo  
11  
12 received funding from the *Association des Médecins Universitaires de l'Hôpital Montfort*.  
13  
14  
15  
16

17 *Other disclosures:* The authors have no conflict of interests to disclose.  
18  
19  
20  
21  
22  
23  
24  
25  
26  
27  
28  
29  
30  
31  
32  
33  
34  
35  
36  
37  
38  
39  
40  
41  
42  
43  
44  
45  
46  
47  
48  
49  
50  
51  
52  
53  
54  
55  
56  
57  
58  
59  
60

Confidential

1  
2  
3  
4  
5  
6  
7  
8  
9  
10  
11  
12  
13  
14  
15  
16  
17  
18  
19  
20  
21  
22  
23  
24  
25  
26  
27  
28  
29  
30  
31  
32  
33  
34  
35  
36  
37  
38  
39  
40  
41  
42  
43  
44  
45  
46  
47  
48  
49  
50  
51  
52  
53  
54  
55  
56  
57  
58  
59  
60

Data about the compositional diversity of Canadian medical schools is limited, however, the few studies available report a common observation: Black medical students are disproportionately underrepresented compared to other minority groups(1,2). In their 2020 cross-sectional study on Canadian medical faculties, Khan et al reports that Black individuals represent 1.7% of the medical class(1), in contrast to 6.4% of the national population of comparable age. Canadian universities and the Association of Faculties of Medicine of Canada have not consistently documented the ethnocultural background of medical school applicants and matriculants(2). Without these demographical data and trends, there exists challenges with identifying the systemic and intersecting factors that interplay with the underrepresentation of Black students in medical education as well as understanding their experiences and differential outcomes (3).

In their qualitative study on underrepresented Black, Hispanic and Native American residents from 21 residency programs, Osseo-Asare et al describes that minority trainees face pervasive discrimination, experience feelings of ‘otherness’ and lack in mentors(4). They also described being burdened with promoting diversity in their institutions, often at the expense of traditional scholarly work more highly esteemed in academia - a phenomenon coined ‘minority tax’ in prior literature(5,6). In one longitudinal study on discrimination set in an undisclosed Canadian medical faculty, Black and other ethnic minority medical students reported experiencing daily microaggressions from peers and social isolation(7). Students often did not report instances of discrimination due to fears of having their claims dismissed or lacking access to appropriate institutional support(7,8). The limited availability of data on Black students’ experiences does not mean disparities, discrimination and systemic exclusion are absent from Canadian medical faculties(9,10). Henry et al’s landmark study on the experiences of racialized faculty in Canadian

academia highlighted that universities reproduce the accepted social hierarchy where non-White minority are excluded and marginalized(11).

Developing institutional frameworks that address racism tailored to the Canadian context requires filling the knowledge gaps about discrimination among racialized medical students. Currently, the characterization and collective experience of Black medical students across Canada has not yet been reported in literature. In this study, the research questions are: *Do Black medical students in Canada face discrimination in medical education? If so, what are these experiences?* As Canadian medical schools devise strategies to diversify their student body, understanding the experiences of Black students in medical education is paramount to fostering a culture of inclusion and equity, while eliminating institutional barriers to their advancement and livelihood.

## METHOD

### Study setting and population

There are 17 Canadian faculties of medicine usually divided into four geodemographic regions: Ontario, Quebec, Atlantic and Western. Together, these faculties train approximately 10,000 medical students(12). The number of self-identifying Black medical students and trainees across Canadian medical schools is currently unknown. The Black Medical Association of Canada (BMSAC), a non-profit student-led organization, was founded in November of 2019 with the mission of unifying, supporting, and fostering equitable representation of Black students in Canadian medical schools(13). At the time of our study, the association had 128 active members. Membership to the BMSAC is inclusive to all self-identifying Black medical students and this association is estimated to include the majority of Black medical students in Canada(13).

1  
2  
3  
4  
5  
6  
7  
8  
9  
10  
11  
12  
13  
14  
15  
16  
17  
18  
19  
20  
21  
22  
23  
24  
25  
26  
27  
28  
29  
30  
31  
32  
33  
34  
35  
36  
37  
38  
39  
40  
41  
42  
43  
44  
45  
46  
47  
48  
49  
50  
51  
52  
53  
54  
55  
56  
57  
58  
59  
60

**Study procedure**

This is a cross-sectional, descriptive study using an online, anonymous, and self-administered questionnaire. The recruitment material and SurveyMonkey® link were sent to the BMSAC for dissemination through listserv. Data collection occurred from January 12<sup>th</sup>, 2021 to March 11<sup>th</sup>, 2021. A snowball sampling method was used to further optimize recruitment. The eligibility criteria included: (1) Self-identifying as Black and (2) Being a medical student enrolled at a Canadian faculty of medicine or a first-year resident who completed medical school at a Canadian faculty in 2020. First-year residents were included in the cohort of participants given their recent completion of all 3 or 4 years of medical school and given that most of their experience in medicine could still be attributed to their undergraduate medical studies at the time of questionnaire dissemination.

**Instrument design**

The content of the questionnaire was adapted from validated questionnaires exploring minority students and faculty member’ perceptions of the medical school environment in the United-States and United Kingdom(4,14,15). Our questionnaire was reviewed by a multidisciplinary group of professionals, including a social scientist. It included 63 questions that began with exploring sociodemographic data and then five domains of interest, which are outlined below. Participants were asked to select/declare their ethnocultural origin; "race" and “ethnocultural identity” were used interchangeably in our study. Other demographic data included respondents’ gender identity, native language, year of study and the geographic region of their medical school. We used household income during the second decade of life as a direct indicator of socioeconomic status. For the five subsequent domains of interest, the questionnaire was divided into the

1  
2  
3 following sections: (1) Inclusion and diversity, (2) Wellness, (3) Discrimination, (4) Career  
4 advancement, and (5) Diversity responsive medical education. The quantitative  
5 online questionnaire was comprised of dichotomic closed-ended questions (yes or no) as well as  
6 closed-ended questions with 6-point Likert scales. Prior to dissemination, we piloted the  
7 questionnaire with non-participants to assess survey response process and clarity.  
8  
9  
10  
11  
12  
13  
14  
15  
16

17 The work presented in this article forms the quantitative part of our mixed-methods study on the  
18 experiences of Black medical students in Canada. The qualitative phase of the study will be  
19 presented at another date and will provide further understanding on the lived experiences of our  
20 study population.  
21  
22  
23  
24  
25  
26  
27

## 28 **Data analysis**

29  
30 Guided by our literature review, we regrouped items of our questionnaire in distinct semantic  
31 dimensions designed to reliably assess various components of minority experience in medicine  
32 and guide our final data analysis. We ran an exploratory factor assay and Cronbach  $\alpha$  reliability  
33 analysis to redefine our survey domains. We only kept dimensions or grouped questions that  
34 demonstrated good reliability with a Cronbach  $\alpha$  coefficient higher than 0.7 (**table 1**). Descriptive  
35 data analysis consisted of frequencies for each reliable dimension or independent item responses.  
36 Inferential analysis was performed with Chi-square to identify any correlations between  
37 sociodemographic variables and calculated scores of reliable domains and individual items.  
38 Statistical analyses were performed in collaboration with an independent biostatistician using  
39 SPSS software version 25 (IBM SPSS Statistics, Amronk, New York).  
40  
41  
42  
43  
44  
45  
46  
47  
48  
49  
50  
51  
52  
53  
54  
55  
56  
57  
58  
59  
60

Table 1 Statistical characteristics of survey dimensions’ impact of minority status amongst Black medical students

| Reliable domains and item description                                                                                                                                                                                                                                                                                                                                                                                                                                                                                                                   | Number of items | Cronbach $\alpha$ |
|---------------------------------------------------------------------------------------------------------------------------------------------------------------------------------------------------------------------------------------------------------------------------------------------------------------------------------------------------------------------------------------------------------------------------------------------------------------------------------------------------------------------------------------------------------|-----------------|-------------------|
| <b>Academic inclusion</b><br>Feeling welcomed in faculty, Ease to make friends in medical school, Able to create strong friendships in medical school, Ethnicity as a barrier to fit in with peers (R) <sup>a</sup> .                                                                                                                                                                                                                                                                                                                                   | 5               | 0.751             |
| <b>Clinical inclusion</b><br>Ethnicity as a barrier to feel welcomed by preceptors (R), Ethnicity as a barrier to fit in medical team (R), Ethnicity as a barrier to feel welcomed by patients (R).                                                                                                                                                                                                                                                                                                                                                     | 3               | 0.893             |
| <b>Discrimination</b><br>Reported incident(Y/N) <sup>b</sup> , Sought institutional support(Y/N), Received institutional support(Y/N).                                                                                                                                                                                                                                                                                                                                                                                                                  | 3               | 0.847             |
| <b>Resilience</b><br>Impact of discrimination by peer or medical personnel on confidence (R), Impact of discrimination by peer or medical personnel on career advancement (R), Impact of discrimination by patient on confidence (R), Impact of discrimination by patient on career advancement (R).                                                                                                                                                                                                                                                    | 4               | 0.780             |
| <b>Wellness</b><br>Increasing negative feelings regarding clinical work or school (R), Feeling drained in clinic or at school (R).                                                                                                                                                                                                                                                                                                                                                                                                                      | 2               | 0.775             |
| <b>Career advancement</b><br>Discrimination seen as a barrier to professional success (R), Discrimination seen as a barrier to professional satisfaction (R), Perceived academic performance, Refused opportunities because of ethnicity (R), Evaluations impacted by ethnicity (R), Mentorship opportunities impacted by ethnicity (R), Facilitated mentorship with concordant ethnicity (R), Acquiring letters of recommendations impacted by ethnicity (R), Speciality choice impacted by ethnicity (R), City of training impacted by ethnicity (R). | 10              | 0.821             |
| <b>Minority tax</b><br>Pressure to work more than peers (R), Tasked to find solutions for diversity (R), Tasked to serve minority patients (R), Tasked to respond to questions related to minorities (R), Pressure to be a minority ambassador (R), Pressure to dedicate more time to equity causes than peers (R), Consecrates more time than peers to equity causes (R), Closer ties to minority peers (R), Professional development time impacted by equity causes (R).                                                                              | 8               | 0.878             |
| <b>Diversity in Medical Education</b><br>Class perceived as ethnoculturally diverse, Class perceived as diverse (not including ethnicity), Available faculty program promoting diversity, Faculty promotes diversity in curriculum and composition, Curriculum responsive to clinical ethnocultural factors.                                                                                                                                                                                                                                            | 5               | 0.814             |

<sup>a</sup>(R) = Reverse coded question

<sup>b</sup>(Y/N) = dichotomic question to which the answer can be yes or no



## Ethics

Ethics approval was granted by the Health Sciences and Sciences Research Ethics Board of the University of Ottawa on January 2, 2021. ID#: H-08-20-5969.

## RESULTS

### Demographics

We received a total of 52 responses from our sample population of 128 active BMSAC medical student members (39.8% response rate) (**Table 2**). The survey was completed by respondents that represented all four geodemographic regions (Ontario, Quebec, Atlantic and Western), including 13 of all 17 Canadian medical schools. Our response sample had representation across all eligible years of study. Most respondents self-identified as women (75%) and 25% as men. Due to the unique scholar path and low sample size of MD/PhD students, their data was excluded from analysis.

About 96.1% of respondents self-identified as Black and 3.9% as mixed Black. Majority of respondents reported that while growing up, their parents' gross income was middle to high (above poverty line of \$37,542.00 per year) (**figure 1**). In other words, majority of respondents did not come from a low-income family.

### *Academic and Clinical Inclusion*

69.4% (34/49) of participants responded positively to survey questions and statements ascertaining their perception of medical school belonging—agreeing that they belonged in their medical school community (**figure 2**). Similarly, 66.7% (32/48) of the responses indicated that they felt included or integrated into the medical team of their clinical settings.

1  
2  
3  
4  
5  
6  
7  
8  
9  
10  
11  
12  
13  
14  
15  
16  
17  
18  
19  
20  
21  
22  
23  
24  
25  
26  
27  
28  
29  
30  
31  
32  
33  
34  
35  
36  
37  
38  
39  
40  
41  
42  
43  
44  
45  
46  
47  
48  
49  
50  
51  
52  
53  
54  
55  
56  
57  
58  
59  
60

Table 2. Socio-demographic and professional characteristics of surveyed Black medical students in Canadian medical institutions, n = 52

| Characteristic                               | n (%)      |
|----------------------------------------------|------------|
| <b>Demographics</b>                          |            |
| Gender                                       |            |
| Female                                       | 39 (75%)   |
| Male                                         | 13 (25%)   |
| Native language (n = 51) <sup>a</sup>        |            |
| English                                      | 28 (54.9%) |
| French                                       | 14 (27.5%) |
| Other                                        | 9 (17.6%)  |
| <b>Academic demographics</b>                 |            |
| Geographic region of attended medical school |            |
| Ontario                                      | 28 (53.8%) |
| Quebec                                       | 11 (21.2%) |
| Western                                      | 9 (17.3%)  |
| Atlantic                                     | 4 (7.7%)   |
| Learner academic level                       |            |
| First year medical student                   | 12 (23.1%) |
| Second year medical student                  | 12 (23.1%) |
| Third year medical student                   | 13 (25%)   |
| Fourth year medical student                  | 7 (13.5%)  |
| First year resident                          | 7 (13.5%)  |
| MD/PhD medical student                       | 1 (1.9%)   |
| <b>Ethnocultural identity</b>                |            |
| Self-reported identity (n = 51) <sup>a</sup> |            |
| Black                                        | 49 (96.1%) |
| Mixed Black                                  | 2 (3.9%)   |
| Ethnicity                                    |            |
| Monoethnic Black                             |            |
| African                                      | 15 (28.8%) |
| Afro-Canadian                                | 9 (17.3%)  |
| Afro-Caribbean                               | 4 (7.7%)   |
| Black Nova Scotian                           | 1 (1.9%)   |
| Multiethnic Black <sup>b</sup>               | 12 (23.1%) |
| Multiethnic Mixed Black <sup>c</sup>         | 11 (21.2%) |

<sup>a</sup>There are discrepancies in sample size with certain questions when participants provided no response or declined to answer.

<sup>b</sup>As opposed to monoethnic black, individuals that are multiethnic Black identify with multiple groups of African descent

<sup>c</sup>Multiethnic mixed black refers to individuals that identify with at least one other non-black ethnocultural group

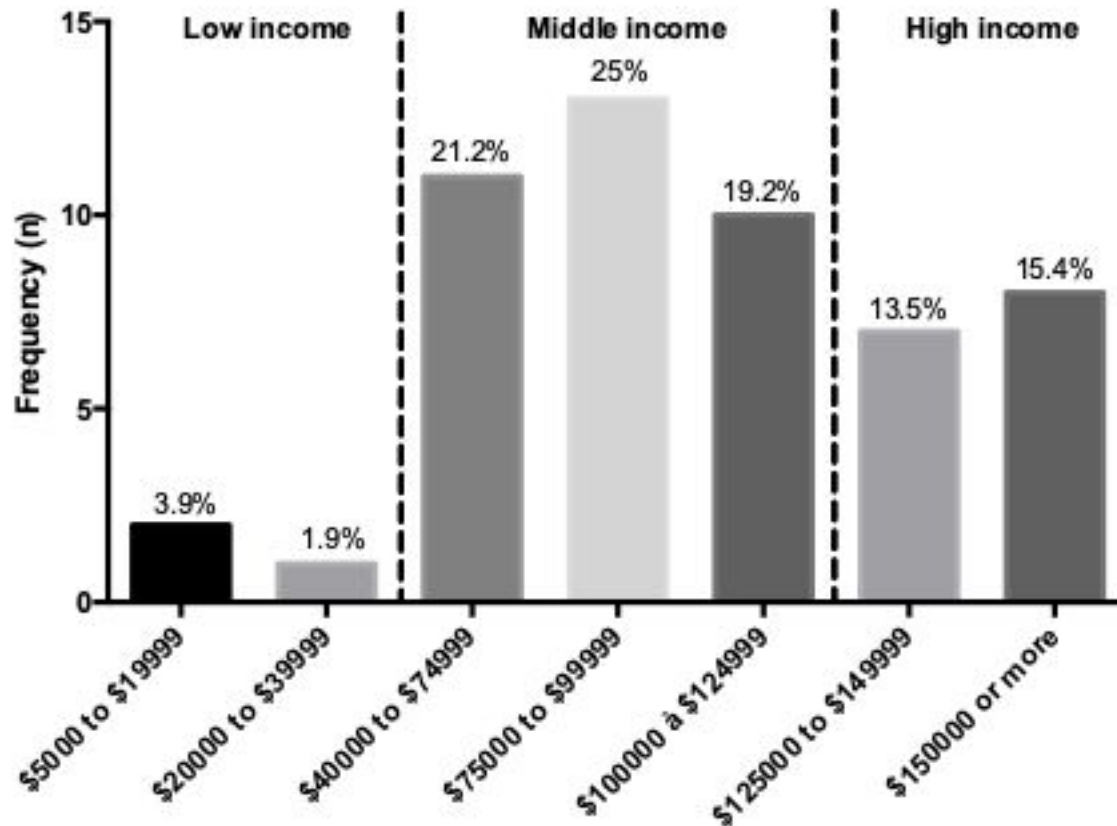

Figure 1 Parental income distribution of surveyed Canadian Black Medical Students, n = 52

The threshold for 'low income' was approximated to 40,000\$ and for 'high income' to 125,000\$ annual gross salary of the respondents' household during youth. As shown by the graph, most Black medical students come from middle to high socio-economic class.

1  
2  
3  
4  
5  
6  
7  
8  
9  
10  
11  
12  
13  
14  
15  
16  
17  
18  
19  
20  
21  
22  
23  
24  
25  
26  
27  
28  
29  
30  
31  
32  
33  
34  
35  
36  
37  
38  
39  
40  
41  
42  
43  
44  
45  
46  
47  
48  
49  
50  
51  
52  
53  
54  
55  
56  
57  
58  
59  
60

**Discrimination**

58.8% (30/51) of participants responded “Yes” to having experienced discrimination in medical school (**table 3**). The majority of these incidents were perpetrated by a “patient” or “student/resident or peer”, followed by “hospital staff physician, nurses or preceptors”. Most students shared these experiences with their student peers (80.8%, 21/26). Moreover, a majority of students did not report these incidents: 30.8% (8/26) reported seeking institutional support and 27.3% (6/22) of participants reported receiving intuitional support (**table 3**). 76% (19/25) of respondents who experienced discrimination in medical school had negative experience with reporting incidents (**figure 2**).

The Chi-square analysis showed a significant association between the years of study in medical school and rates of discrimination—in other words, more participants in clerkship-years' reported experiencing discrimination than those in their pre-clerkship years [ $X^2(4, N=49) = 17.939$ ,  $p=0.001$ ] (**Appendix 1, available at** [\\_](#)). When analyzed by region, the Chi-square test indicates that there is a significant difference between the different regions (I.e., Quebec, Ontario, Atlantic and Western) and their proportion of students receiving institutional support for discrimination. Atlantic region respondents reported the highest proportion of institutional support. Ontario and Western reported a higher proportion of students not receiving institutional support for discrimination. Quebec respondents had the highest proportion of negative responses pertaining to receiving institutional support for racial/ethnic discrimination [ $X^2(3, N=22) = 9.612$ ,  $p=0.032$  (**Appendix 1**).

Table 3. Surveyed Black medical students' experiences with discrimination in Canadian medical school

|                                                                                              | Response       | n (%)      |
|----------------------------------------------------------------------------------------------|----------------|------------|
| <b>Dealing with experiences of discrimination</b>                                            |                |            |
| Student experienced discrimination in medical school (n = 51)                                | Yes            | 30 (58.8%) |
|                                                                                              | No             | 19 (37.3%) |
|                                                                                              | Did not answer | 2 (3.9%)   |
| Student shared experience with other student peers (n = 26) <sup>a</sup>                     | Yes            | 21 (80.8%) |
| <b>Institutional support</b>                                                                 |                |            |
| Student sought institutional support (n = 26) <sup>a</sup>                                   | Yes            | 8 (30.8%)  |
| Student received institutional support (n = 22) <sup>a</sup>                                 | Yes            | 6 (27.3%)  |
| Quality of institutional support (n = 8) <sup>b</sup>                                        | Poor           | 2 (25.0%)  |
|                                                                                              | Fair           | 3 (37.5%)  |
|                                                                                              | Good           | 3 (37.5%)  |
|                                                                                              | Very Good      | 0 (0%)     |
|                                                                                              | Excellent      | 0 (0%)     |
| <b>Actors by which students report experiencing discrimination from (n = 26)<sup>a</sup></b> |                |            |
| Patient                                                                                      |                | 13         |
| Student peer or resident                                                                     |                | 11         |
| Professor or lecturer                                                                        |                | 6          |
| Hospital staff (staff physicians)                                                            |                | 6          |
| Preceptor                                                                                    |                | 5          |
| Hospital staff (nurses)                                                                      |                | 5          |
| Hospital staff (allied health)                                                               |                | 3          |

NB: The sample size varied in function of non-respondents or non-applicable participants with certain questions (ex. Only students that answered 'yes' to having experienced discrimination could answer the <sup>(a)</sup> marked prompts and only students that received institutional support could answer the <sup>(b)</sup> prompts.). This question was also multiple choice, meaning the total n is greater than the number of respondents.

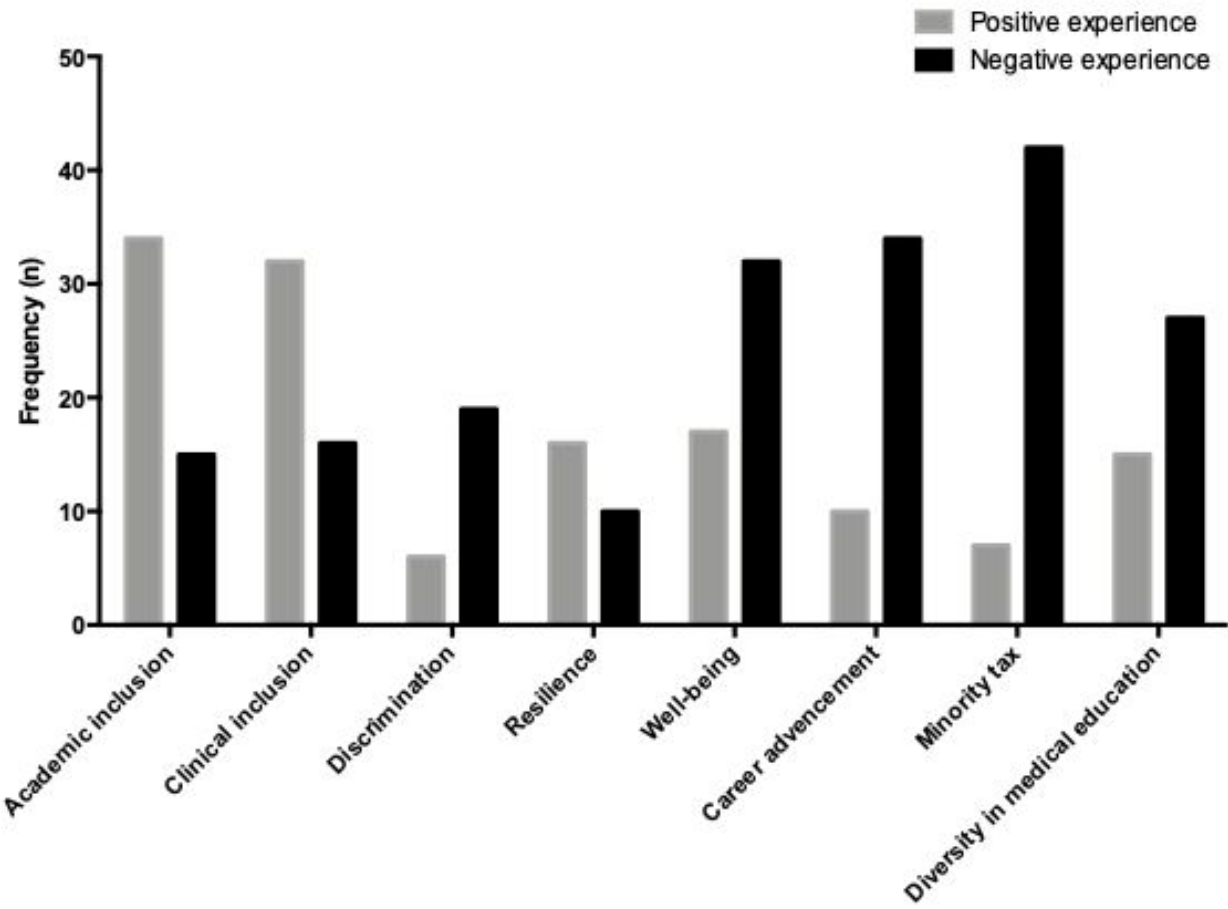

Figure 2 Frequency distribution of Black medical students' perceptions and experiences in Canadian Medical Schools by survey dimensions, n=51.

Answers were graphed by frequency of positive (gray) or negative (black) responses. Six-point Likert scale were grouped as negative if coded between 1 (strongly disagree) to 3 (Disagree), and as positive if coded between 4 (agree) to 6 (strongly agree). The Resilience and Discrimination survey domain had a lower sample size (n=26) due to experience with discrimination being a prerequisite to respondents answering these specific questions. Overall, we can visualize academic inclusion, clinical inclusion, and resilience to have positive responses whilst all other domains were reported to be experienced as negative by survey participants.

### ***Resilience***

61.5% (16/26) of the respondents endorsed resilience statements when describing how they dealt with racial discrimination (**figure 2**). In other words, most respondents agreed that their confidence or career advancement as a medical student were not negatively impacted despite experiences of discrimination

### ***Wellness***

65.3% (32/49) of respondents indicated that their well-being was poor in medical school, agreeing with statements that elicited symptoms of burn-out in themselves (**figure 2**).

### ***Career Advancement***

Majority (79.5%, 35/44) of respondents agreed with statements that reported race/ethnicity negatively impacting their career advancement (**figure 2**). The proportion of Black medical students who reported that being Black had a negative impact on their career advancement decreased from first year to fourth year [ $X^2 (4, N=41) = 10.486, p=0.034$ ] (**Appendix 1**). In other words, a higher proportion of third- and fourth-year medical students agreed with statements that indicated being Black did not have a negative impact on their career advancement.

### ***Minority Tax***

Most (85.7%, 42/49) participants agreed with statements that the phenomenon of ‘minority tax’ was regarded as a negative experience (**figure 2**). Also, a higher proportion of female respondents compared to males agreed with such statements [ $X^2 (1, N=49) = 5.754, p=0.029$ ] (**Appendix 1**).

***Diversity in Medical Education***

64.3% (27/42) of respondents endorsed negative responses for questions asking whether they found their medical school faculty or medical curricula to be diverse in its representation (**figure 2**).

**Interpretation**

Our findings show that Black medical students are significantly affected by discrimination while training in Canadian medical schools. To date, little is known about the experiences of racism amongst Black medical students in Canada and our study contributes to addressing this knowledge gap. In our survey, a majority of reported personal encounters with discrimination were experienced in both clinical and academic contexts, most notably from patients, peers, and hospital staff. Students further along in their training were more likely to endorse having experienced discrimination in medical school, showing a positive correlation between years in undergraduate medical education and exposure to discrimination. Respondents were more likely to report these negative experiences to peers rather than reporting to faculty or seeking institutional support. Only 1 in 3 respondents that experienced interpersonal discrimination reported incidents to their medical school and even fewer sought out and received requested support. Although most respondents reported feeling included in their social interactions within clinical and academic settings and being resilient in the face of discrimination, our study results highlights that most Black medical students harbor negative experiences regarding reporting discrimination, their own wellness, their career advancement, feelings of being ‘taxed’ as a minority and a lack of diverse representation in faculty and in curricula. These marginalized experiences of Black medical students as well as the



pedagogical practices and perpetuation of inequity through inconsistent support are suggestive of institutional racism. As defined in Sir William Macpherson's Stephen Lawrence report: «[Institutional racism is] the collective failure of an organization to provide an appropriate and professional service [and it is] detected in processes, attitudes and behaviour that amount to discrimination through unwitting prejudice, ignorance, thoughtlessness, and racist stereotyping which disadvantage minority ethnic people»(16).

Many of our findings are consistent with prior studies about systemically excluded minority groups in medical education. Mpalirwa et al's 2020 qualitative study about Ontarian Black residents and physicians found that over 70% of respondents experienced mistreatment from patients, peers, and preceptors, and this confirms our finding that exposure to racism begins early in medical training and persists throughout training. Other studies outside of Canada similarly indicate that Black and minority ethnic medical students are unlikely to report discrimination, as reporting is perceived to be ineffective and victimizing(8). This suggests that medical school administrators may be unaware of interpersonal racism experienced by their students and, paradoxically, the denial of these negative experiences renders them ill-equipped to properly support affected students. Moreover, in their review of 28 studies on underrepresented minorities in medicine, Orom et al describe that minority students were more likely to experience discrimination, have poorer self-esteem, have a smaller social network and have more difficulties finding mentors than their white counterparts(17). If left unaddressed, this adverse learning climate will continue to entrench attainment gaps in medical education and advancement amongst underrepresented minorities.

1  
2  
3  
4  
5  
6  
7  
8  
9  
10  
11  
12  
13  
14  
15  
16  
17  
18  
19  
20  
21  
22  
23  
24  
25  
26  
27  
28  
29  
30  
31  
32  
33  
34  
35  
36  
37  
38  
39  
40  
41  
42  
43  
44  
45  
46  
47  
48  
49  
50  
51  
52  
53  
54  
55  
56  
57  
58  
59  
60

Traditionally, excellence has been a unifying framework in academic and medical communities; now more than ever, it becomes important to integrate social accountability within the narratives of excellence, with the goal of ultimately aligning excellence with societal outcomes(18,19). As faculties continue to expand their equity practices beyond antidiscrimination policies, mitigating the occurrence and impact of discrimination requires a comprehensive antiracism plan involving all key actors(11). This could include antiracism training for faculty, non-stereotypical diversity representation in curriculum and the creation of an institutional service dedicated to addressing inequity complaints while promoting equity. Finally, disrupting inequities also requires a review of inaccurate use of “race” as a biological entity in medicine and academia(20). The consistent use of race as a social construct, would allow a better understanding of racism as risk factor stemming from the individuals’ relation to societal norms and not from within the individual, themselves(21).

**Limitations**

There is currently no accurate estimate of the number of current Canadian Black medical students, therefore, the response rate and representativity of our sample population remains unknown. Further, the quantitative nature of this study limits our understanding of the experiences of Black medical students. There is a need for more qualitative research characterizing the discrimination lived by these students – this will be further explored in the subsequent phase of our study. This study is also only the first step towards validating our multidimensional instrument although it already has shown robust reliability for its domains with Cronbach  $\alpha$  above 0.7. Even more, there is a pressing need for additional robust research that will identify and address inequities for underrepresented minorities in medical education.

## Conclusion

Our study highlights the experiences of discrimination faced by Black medical students in Canada during their undergraduate medical training, and our findings directly challenge the conception that Canadian medical schools are impervious to racism. As we move toward enhancing equity and inclusivity in Canadian medical education, academic institutions must commit to bringing awareness, and creating sustainable systemic changes through multidimensional and interdisciplinary anti-racist approaches.

Confidential

REFERENCES

1. Khan R, Apramian T, Kang JH, Gustafson J, Sibbald S. Demographic and socioeconomic characteristics of Canadian medical students: a cross-sectional study. *BMC Med Educ* [Internet]. 2020 Dec 12;20(1):151. Available from: <https://bmcmmededuc.biomedcentral.com/articles/10.1186/s12909-020-02056-x>

2. Walji M. Diversity in medical education: data drought and socioeconomic barriers. *Can Med Assoc J* [Internet]. 2015 Jan 6;187(1):11–11. Available from: <http://www.cmaj.ca/lookup/doi/10.1503/cmaj.141502>

3. Dryden OS, Nnorom O. Time to dismantle systemic anti-Black racism in medicine in Canada. *Cmaj*. 2021;193(2):E55–7.

4. Osseo-Asare A, Balasuriya L, Huot SJ, Keene D, Berg D, Nunez-Smith M, et al. Minority Resident Physicians’ Views on the Role of Race/Ethnicity in Their Training Experiences in the Workplace. *JAMA Netw open*. 2018;1(5):e182723.

5. Rodríguez JE, Campbell KM, Pololi LH. Addressing disparities in academic medicine: What of the minority tax? Vol. 15, *BMC Medical Education*. BioMed Central Ltd.; 2015.

6. Campbell KM, Rodríguez JE. Addressing the Minority Tax: Perspectives from Two Diversity Leaders on Building Minority Faculty Success in Academic Medicine. *Acad Med*. 2019;94(12):1854–7.

7. Beagan BL. “Is this worth getting into a big fuss over?” Everyday racism in medical school. *Med Educ*. 2003;37(10):852–60.

8. Broad J, Matheson M, Verrall F, Taylor AK, Zahra D, Alldridge L, et al. Discrimination, harassment and non-reporting in UK medical education. *Med Educ* [Internet]. 2018 Apr;52(4):414–26. Available from: <http://doi.wiley.com/10.1111/medu.13529>

9. Karani R, Varpio L, May W, Horsley T, Chenault J, Miller KH, et al. Commentary: Racism and Bias in Health Professions Education: How Educators, Faculty Developers, and Researchers Can Make a Difference. *Acad Med*. 2017;92(11):1–6.

10. Mpalirwa J, Lofters A, Nnorom O, Hanson MD. Patients, Pride, and Prejudice: Exploring Black Ontarian Physicians’ Experiences of Racism and Discrimination. *Acad Med* [Internet]. 2020 Nov 27;95(11S):S51–7. Available from: <https://journals.lww.com/10.1097/ACM.0000000000003648>

11. Henry F, Dua E, James CE, Kobayashi A, Li P, Ramos H, et al. *The Equity Myth: Racialization and Indigeneity at Canadian Universities*. Vancouver, BC: UBC Press; 2017. 392 p.

12. Association of Faculties of Medicine of Canada. *Canadian Medical Education Statistics*. 2019;41:182.

13. Black Medical Students’ Association of Canada. Available from: <https://www.bmsac.ca>

14. Carr PL, Ash AS, Friedman RH, Szalacha L, Barnett RC, Palepu A, et al. Faculty Perceptions of Gender Discrimination and Sexual Harassment in Academic Medicine. 2000.

15. Peterson NB, Friedman RH, Ash AS, Franco S, Carr PL. Faculty self-reported experience with racial and ethnic discrimination in academic medicine. *J Gen Intern Med*. 2004;19(3):259–65.

16. MacPherson W. *The Stephen Lawrence Inquiry: Report of an Inquiry by Sir William MacPherson of Cluny*. 1999.

17. Orom H, Semalulu T, Underwood W. The social and learning environments experienced by underrepresented minority medical students: A narrative review. *Acad Med*.

- 2013;88(11):1765–77.
18. Roberts-MacDonald M, Razack S. Navigating social distance in foundational clinical encounters: Understanding medical students' early experiences with diverse patients. *Med Teach* [Internet]. 2018 Sep 2;40(9):934–43. Available from: <https://www.tandfonline.com/doi/full/10.1080/0142159X.2017.1417578>
  19. Razack S, Maguire M, Hodges B, Steinert Y. What Might We Be Saying to Potential Applicants to Medical School? Discourses of Excellence, Equity, and Diversity on the Web Sites of Canada's 17 Medical Schools. *Acad Med* [Internet]. 2012 Oct;87(10):1323–9. Available from: <http://journals.lww.com/00001888-201210000-00012>
  20. Levey AS, Titan SM, Powe NR, Coresh J, Inker LA. Kidney Disease, Race, and GFR Estimation. *Clin J Am Soc Nephrol* [Internet]. 2020 Aug 7;15(8):1203–12. Available from: <https://cjasn.asnjournals.org/lookup/doi/10.2215/CJN.12791019>
  21. Zewude R, Sharma M. Critical race theory in medicine. *Can Med Assoc J* [Internet]. 2021 May 17;193(20):E739–41. Available from: <http://www.cmaj.ca/lookup/doi/10.1503/cmaj.210178>

Confidential

**Appendix 1** Correlational studies between sociodemographic characteristics and Black medical student experiences in Canadian medical schools.

|                                                                                                  | Negative experience | Positive experience | Chi-squared $\chi^2$ | p-value <sup>a</sup> |
|--------------------------------------------------------------------------------------------------|---------------------|---------------------|----------------------|----------------------|
| <b>Minority tax (n = 49)</b>                                                                     |                     |                     |                      |                      |
| <i>Minority tax : Gender</i>                                                                     |                     |                     |                      |                      |
| Female (n = 37)                                                                                  | 2                   | 35                  | 9.730                | 0.007                |
| Male (n = 12)                                                                                    | 5                   | 7                   |                      |                      |
| <i>Minority tax : Year of study</i>                                                              |                     |                     |                      |                      |
| First year (n = 10)                                                                              | 2                   | 8                   | 10.072               | 0.034                |
| Second year (n = 12)                                                                             | 2                   | 10                  |                      |                      |
| Third year (n = 14)                                                                              | 0                   | 14                  |                      |                      |
| Fourth year (n = 6)                                                                              | 3                   | 3                   |                      |                      |
| PGY1 (n = 7)                                                                                     | 0                   | 7                   |                      |                      |
| <b>Student has experienced discrimination: no/yes (n = 49)</b>                                   |                     |                     |                      |                      |
| <i>Discrimination : Year of study</i>                                                            |                     |                     |                      |                      |
| First year (n = 10)                                                                              | 2                   | 8                   | 17.939               | 0.001                |
| Second year (n = 12)                                                                             | 5                   | 7                   |                      |                      |
| Third year (n = 14)                                                                              | 10                  | 4                   |                      |                      |
| Fourth year (n = 6)                                                                              | 6                   | 0                   |                      |                      |
| PGY1 (n = 7)                                                                                     | 7                   | 0                   |                      |                      |
| <b>Student has received institutional support when reporting discrimination: no/yes (n = 22)</b> |                     |                     |                      |                      |
| <i>Institutional support : Location</i>                                                          |                     |                     |                      |                      |
| Atlantic (n = 3)                                                                                 | 0                   | 3                   | 9.612                | 0.032                |
| Ontario (n = 10)                                                                                 | 8                   | 2                   |                      |                      |
| Quebec (n = 2)                                                                                   | 2                   | 0                   |                      |                      |
| Western (n = 7)                                                                                  | 6                   | 1                   |                      |                      |
| <b>Career advancement (n = 41)</b>                                                               |                     |                     |                      |                      |
| <i>Career advancement : Year of study</i>                                                        |                     |                     |                      |                      |
| First year (n = 10)                                                                              | 8                   | 1                   | 10.486               | 0.034                |
| Second year (n = 12)                                                                             | 12                  | 1                   |                      |                      |
| Third year (n = 14)                                                                              | 2                   | 3                   |                      |                      |
| Fourth year (n = 6)                                                                              | 4                   | 1                   |                      |                      |
| PGY1 (n = 7)                                                                                     |                     |                     |                      |                      |

<sup>a</sup>p-value considered significant if below 0.05. Only the domains that showed significant results are shown in this table. Chi-square analysis between our survey domains and other demographics (ethnocultural identity, native language) did not show any significant correlation.
